# Supplementary material
Source: PubMed Central journal article supplement (PMC3635716)
Supplement: JCI63802sd.pdf [file JCI63802sd.pdf]

**Supplementary Figure 1:** Local airway instillation of IC augments Th2-mediated inflammation through Fc $\gamma$ RIII. (A) Timeline for the local instillation model. On days 0, 2, 4, 6, 8, 10, and 12 WT or Fc $\gamma$ RIII<sup>-/-</sup> mice were challenged with OVA or OVA-IC. On day 13, the mice were sacrificed. Airway inflammation was assessed by determining (B) the number of eosinophils (left panel) and CD4<sup>+</sup> T cells (right panel) in the BAL, and (C) representative H&E sections of lung tissue from treated WT and Fc $\gamma$ RIII<sup>-/-</sup> mice. Black bars = 100  $\mu$ m. Data represent the mean  $\pm$

SEM (\*,  $P < 0.05$ ; \*\*\*,  $P < 0.001$ ; ns = not significant). The data in this figure are combined from at least three independent experiments with a total of at least nine mice analyzed per group.

**Supplementary Figure 2:** IC upregulation of IL-33 in WT antigen presenting cells is TLR4 dependent. (A) qPCR analysis of IL-33 mRNA expression in WT or TLR4<sup>-/-</sup> BMDCs treated overnight with OVA or OVA-IC. (B) WT mice received  $\alpha$ -OVA or  $\alpha$ -OVA<sup>depl</sup> serum i.v. followed by an OVA challenge 24 hours later. Six hours after challenge, the mice were sacrificed and AMs and rDCs were sorted from the lungs. IL-33 mRNA expression was assessed by qPCR. (\*\*,  $P < 0.01$ ; \*\*\*,  $P < 0.001$ ; ns = not significant). The mean  $\pm$  SEM from three independent experiments is shown.

**Supplementary Figure 3:** IC uptake in CD11b<sup>+</sup> rDC subpopulations. (A) WT mice were challenged i.t. with OVA-APC or OVA-APC IC. Three hours after challenge, the mice were sacrificed and APC expression on CD11b<sup>+</sup>Ly6C<sup>+</sup> and CD11b<sup>+</sup>Ly6C<sup>-</sup> rDCs from the lung was assessed. (Red– unchallenged, Blue – OVA-APC, Green – OVA-APC IC). Data is a representative flow plot with at least six mice analyzed per group.

**Supplementary Figure 4:** Gating strategy for identifying AMs and rDCs. Live cells were first gated on CD11c<sup>+</sup> expression after which AMs and rDCs were separated based on SSC. The rDC subsets were identified based on CD103<sup>+</sup> and CD11b<sup>+</sup> expression.

**Supplementary Figure 5:** After transfer of enriched lymph node T cells, ILC2 cells do not repopulate the lungs of Rag<sup>-/-</sup>IL2 $\gamma$ <sup>-/-</sup> mice. (A) Gating strategy for identifying ILC2s (Lin<sup>-</sup> Sca-1<sup>+</sup>ICOS<sup>+</sup> ST2<sup>+</sup>). Live cells were first gated on FSC and SSC for lymphocytes. The Lin<sup>-</sup> Sca-1<sup>+</sup> gate was then used for identification of ILC2 cells based on ICOS<sup>+</sup> and ST2<sup>+</sup> expression. The lineage gate included B220, CD3, CD4, CD8, CD11b, CD11c, CD19, F4/80, Fc $\epsilon$ RI, Gr1, NK1.1, and Ter119. (B) Lymph node cells were enriched for T cells by nylon wool non-adherence, or (C) Rag<sup>-/-</sup> or Rag<sup>-/-</sup>IL2 $\gamma$ <sup>-/-</sup> mice were reconstituted with either vehicle control or T cells as described in Figure 2C,D. Percent of lung ILC2 cells (right top corner) was determined within the lymphocyte gate as in Figure S5A.

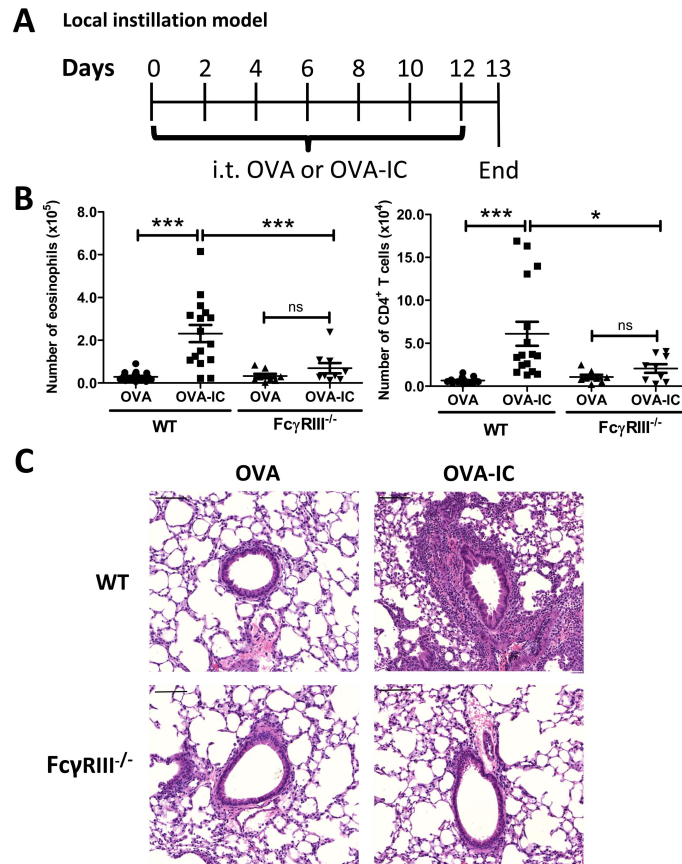

Supplementary Figure 1.

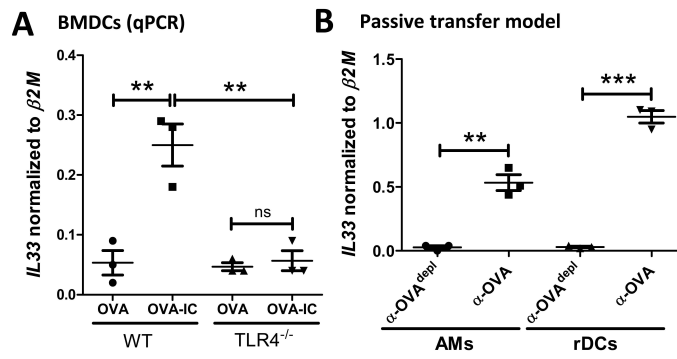

Supplementary Figure 2.

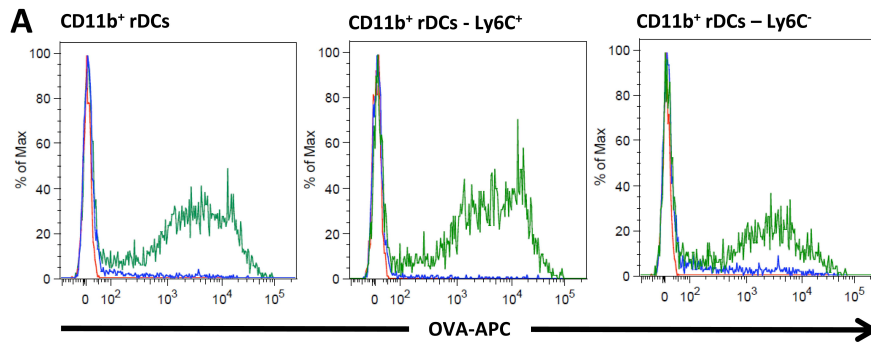

**Supplementary Figure 3.**

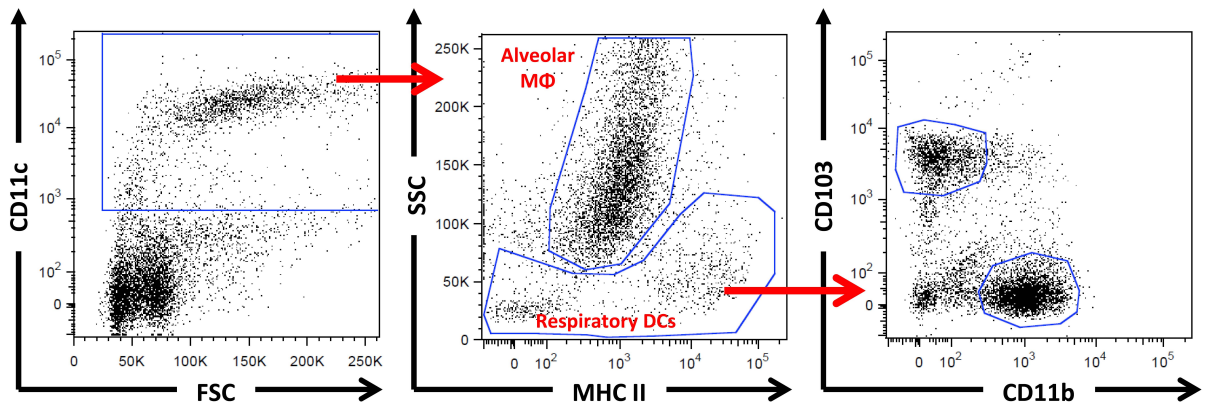

Supplementary Figure 4.

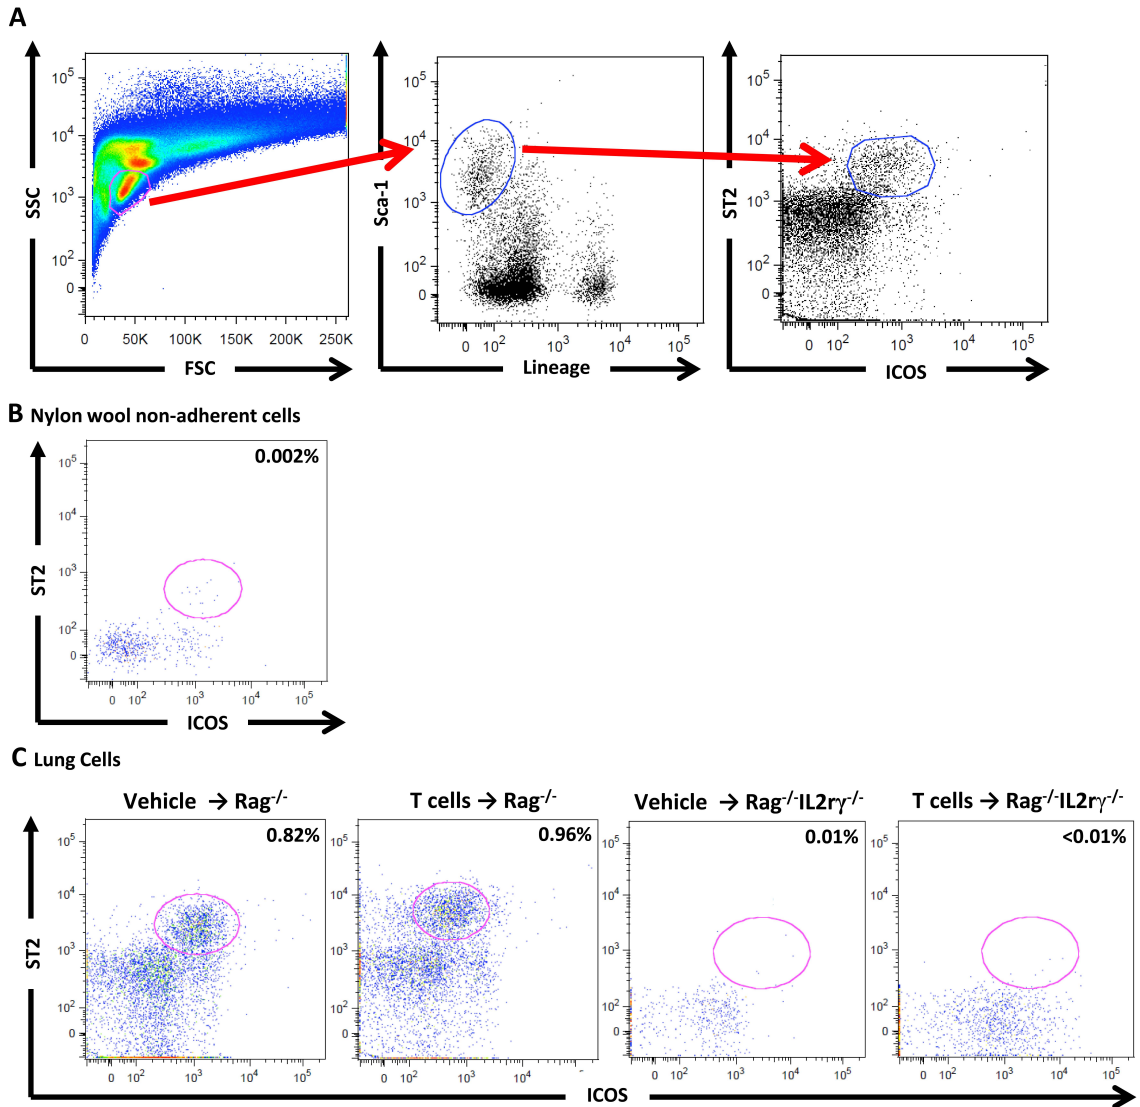

Supplementary Figure 5.
